# Supplementary material
Source: PubMed Central journal article supplement (PMC2754633)
Supplement: pp.109.145144_1.pdf [file pp.109.145144_1.pdf]

## Supplemental data – Marchive *et al.*

Supplemental Figure S1. Relative metabolite contents of *pnp1-1* and WT grown under -P conditions for different time periods.

Supplemental Figure S2. Principal component analysis (PCA) of metabolite profiles.

Supplemental Table S1. Raw data for metabolite contents of *pnp1-1* and WT grown under +P or -P conditions, shown in Figures 7 and S1, respectively. See file Supplemental Table S1.xls.

Supplemental Table S2. Statistic analysis of metabolites data (PCA and 2 way ANOVA). See file Supplemental Table S2.xls.

Supplemental Figure S3. Pi uptake in *pnp1-1* and WT.

Supplemental Table S3. ATH1 microarray data for significantly regulated genes in the 3 hr P starvation experiment. See file Supplemental Table S3.xls.

Supplemental Table S4. ATH1 microarray data for significantly regulated genes in the one week P starvation experiment. See file Supplemental Table S4.xls.

Supplemental Table S5. Statistical significance of the functional categorization of regulated genes using the MapMan-defined BINs.

Supplemental Table S6. Genes encoding chloroplast-targeted proteins which are similarly regulated in *pnp1-1* +P vs. WT +P, and in WT -P vs. WT +P .

Supplemental Table S7. Normalized expression data for quantitative RT-PCR.

Supplemental Table S8. List of primers used for quantitative RT-PCR.

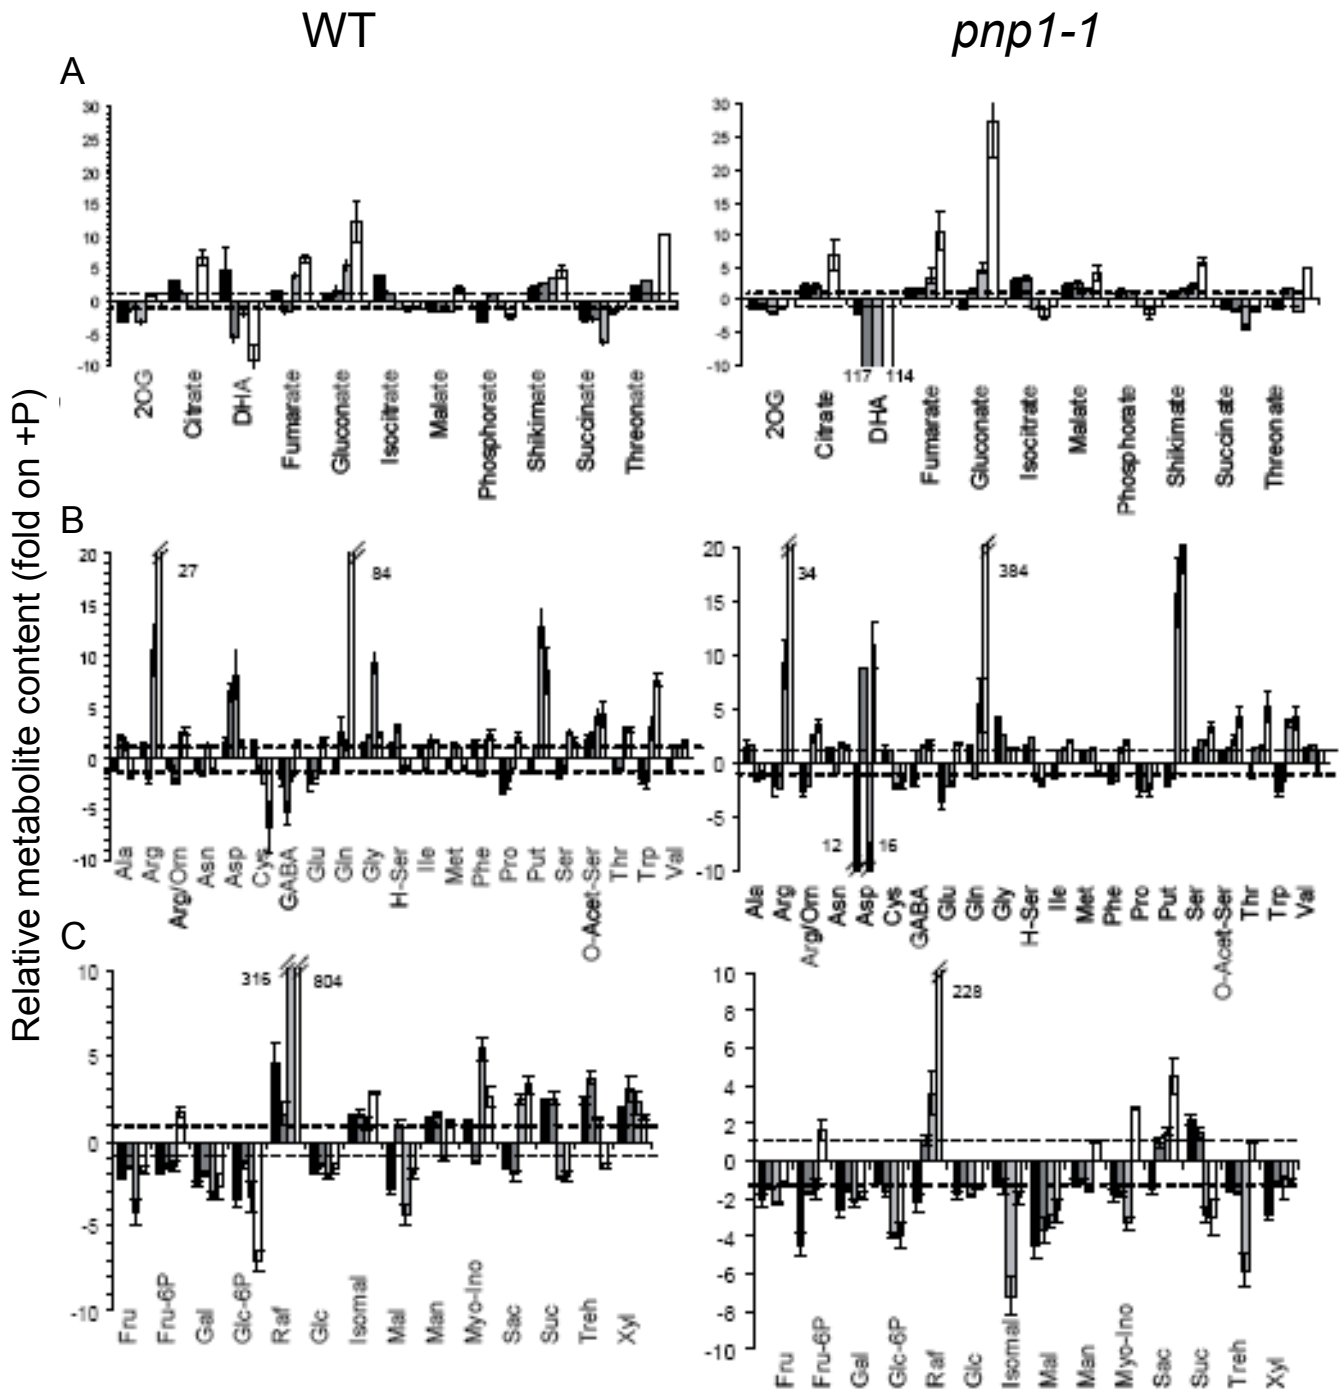

**Figure S1.** Relative content of *pnp1-1* and WT grown in the absence of phosphate for different time periods compared to +P conditions. Metabolites were determined as described in Materials and Methods. Black and dark grey bars represent 3 and 6 hours of phosphate starvation; light grey and white bars represent 1 and 3 weeks of starvation. Data of amino acids (A), sugars (B) and organic acids (C) measurements are presented as average fold change  $\pm$  SE normalized on +P values of each genotype, namely WT or *pnp1-1* seedlings grown in the presence of phosphate. Values are the mean of six independently sampled bulked seedlings. The data set and statistical significance are presented in Table S1.

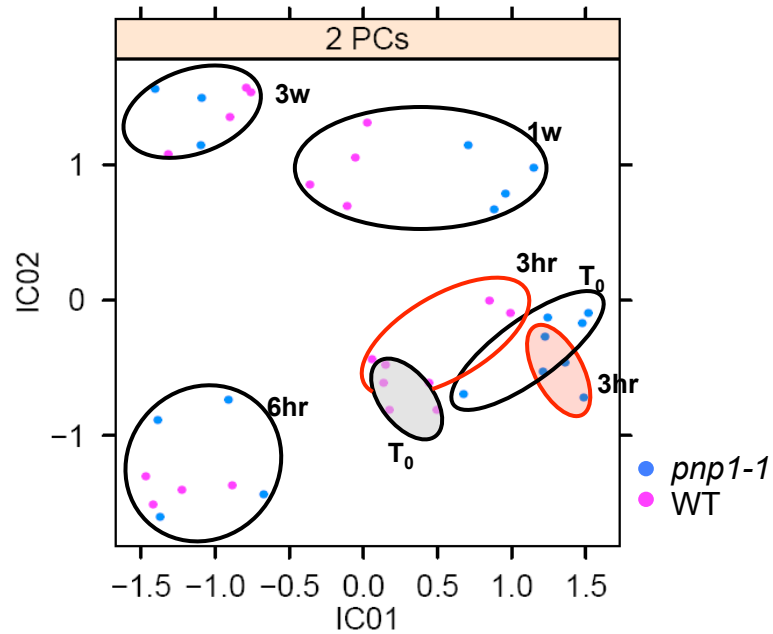

**Figure S2.** Principal component analysis of metabolite profiles. WT (pink dots) and *pnp1-1* (blue dots) when grown with phosphate (T<sub>0</sub>) and without phosphate for 3 hr, 6 hr, 1 week and 3 weeks. PCA is presented as the combinations of the first two dimensions which together comprise 65% of the metabolite variance. Each data point represents an independent sample. The analysis of the data was performed using MeV software (Saeed Al et al., 2003 or <http://www.tm4.org/mev.html>). Further analysis was performed using MetaGeneAlyse (Scholz, 2004) available at <http://metagenealyse.mpimp-golm.mpg.de>. Details of this analysis are presented in Table S2.

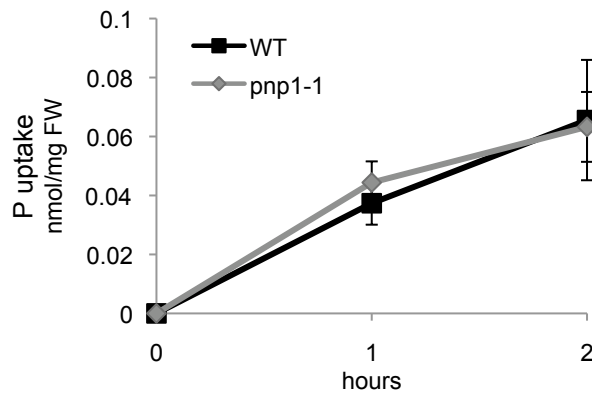

**Figure S3.** Pi uptake in *pnp1-1* and WT plants.

Seedlings were germinated and grown for 2 weeks on nylon meshes on the surface of semisolid MS medium containing 500  $\mu\text{M}$  of Pi, 0.5% sucrose and 0.4% agar. For the experiment, meshes were rinsed once in the same liquid medium and then transferred onto fresh liquid medium containing 1  $\mu\text{Ci/ml}$  of  $^{33}\text{P}$  as radiotracer. After one or two hours, plants were briefly rinsed twice in the same non-radioactive media and then blot-dried onto Whatman paper. Approximately ten plants were pooled, weighed and dried overnight at 65°C in scintillation vials. The Pi uptake was calculated from scintillation counting. At least three replicates in two independent assays were averaged; error bars represent standard deviations. The method is based on the following publication:

**Shin H, Shin HS, Dewbre GR, Harrison MJ** (2004) Phosphate transport in *Arabidopsis*: Pht1;1 and Pht1;4 play a major role in phosphate acquisition from both low- and high-phosphate environments. *Plant J.* **39**: 629-642

*pnp1-1* +P vs WT +P

| bin <sup>a</sup> | name                                             | elements | p-value  |
|------------------|--------------------------------------------------|----------|----------|
| 26               | misc                                             | 1242     | 0        |
| 1                | PS                                               | 162      | 3.48E-19 |
| 27               | RNA                                              | 2318     | 7.53E-18 |
| 31               | cell                                             | 637      | 1.95E-14 |
| 20               | stress                                           | 756      | 1.18E-10 |
| 9                | mitochondrial electron transport / ATP synthesis | 116      | 1.48E-08 |
| 28               | DNA                                              | 917      | 1.70E-08 |
| 16               | secondary metabolism                             | 345      | 6.07E-06 |
| 5                | fermentation                                     | 13       | 6.79E-06 |
| 19               | tetrapyrrole synthesis                           | 43       | 7.22E-05 |
| 4                | glycolysis                                       | 64       | 2.73E-04 |
| 8                | TCA / org. transformation                        | 72       | 0.007    |
| 10               | cell wall                                        | 439      | 0.011    |
| 35               | not assigned                                     | 7981     | 0.015    |
| 6                | gluconeogenesis/ glyoxylate cycle                | 10       | 0.021    |
| 2                | major CHO metabolism                             | 89       | 0.021    |
| 23               | nucleotide metabolism                            | 128      | 0.025    |
| 17               | hormone metabolism                               | 456      | 0.050    |
| 14               | S-assimilation                                   | 13       | 0.093    |
| 29               | protein                                          | 2997     | 0.104    |
| 3                | minor CHO metabolism                             | 122      | 0.121    |
| 11               | lipid metabolism                                 | 339      | 0.164    |
| 7                | OPP                                              | 31       | 0.166    |
| 24               | Biodegradation of Xenobiotics                    | 23       | 0.233    |
| 30               | signalling                                       | 1095     | 0.310    |
| 12               | N-metabolism                                     | 24       | 0.368    |
| 22               | polyamine metabolism                             | 14       | 0.557    |
| 34               | transport                                        | 880      | 0.584    |
| 18               | Co-factor and vitamine metabolism                | 42       | 0.600    |
| 32               | micro RNA, natural antisense etc                 | 44       | 0.606    |
| 15               | metal handling                                   | 58       | 0.689    |
| 13               | amino acid metabolism                            | 212      | 0.770    |
| 33               | development                                      | 556      | 0.789    |
| 21               | redox.regulation                                 | 183      | 0.829    |
| 25               | C1-metabolism                                    | 30       | 0.968    |

WT -P vs WT +P

| bin <sup>a</sup> | name                                             | elements | p-value  |
|------------------|--------------------------------------------------|----------|----------|
| 20               | stress                                           | 756      | 0        |
| 26               | misc                                             | 1242     | 0        |
| 1                | PS                                               | 162      | 6.97E-24 |
| 29               | protein                                          | 2997     | 1.23E-22 |
| 27               | RNA                                              | 2318     | 1.12E-18 |
| 31               | cell                                             | 637      | 1.20E-15 |
| 10               | cell wall                                        | 439      | 9.82E-13 |
| 34               | transport                                        | 880      | 1.16E-10 |
| 16               | secondary metabolism                             | 345      | 2.32E-10 |
| 35               | not assigned                                     | 7981     | 3.05E-08 |
| 17               | hormone metabolism                               | 456      | 7.99E-08 |
| 4                | glycolysis                                       | 64       | 8.43E-08 |
| 19               | tetrapyrrole synthesis                           | 43       | 1.81E-07 |
| 5                | fermentation                                     | 13       | 2.69E-04 |
| 30               | signalling                                       | 1095     | 5.20E-04 |
| 14               | S-assimilation                                   | 13       | 6.82E-04 |
| 15               | metal handling                                   | 58       | 0.001    |
| 28               | DNA                                              | 917      | 0.001    |
| 25               | C1-metabolism                                    | 30       | 0.014    |
| 9                | mitochondrial electron transport / ATP synthesis | 116      | 0.026    |
| 18               | Co-factor and vitamine metabolism                | 42       | 0.043    |
| 6                | gluconeogenesis/ glyoxylate cycle                | 10       | 0.048    |
| 8                | TCA / org. transformation                        | 72       | 0.087    |
| 2                | major CHO metabolism                             | 89       | 0.132    |
| 7                | OPP                                              | 31       | 0.184    |
| 24               | Biodegradation of Xenobiotics                    | 23       | 0.190    |
| 12               | N-metabolism                                     | 24       | 0.196    |
| 32               | micro RNA, natural antisense etc                 | 44       | 0.284    |
| 11               | lipid metabolism                                 | 339      | 0.286    |
| 3                | minor CHO metabolism                             | 122      | 0.293    |
| 21               | redox.regulation                                 | 183      | 0.375    |
| 22               | polyamine metabolism                             | 14       | 0.462    |
| 33               | development                                      | 556      | 0.546    |
| 23               | nucleotide metabolism                            | 128      | 0.620    |
| 13               | amino acid metabolism                            | 212      | 0.939    |

*pnp1-1* -P vs *pnp1-1* +P

| bin <sup>a</sup> | name                                             | elements | p-value  |
|------------------|--------------------------------------------------|----------|----------|
| 20               | stress                                           | 756      | 1.54E-05 |
| 4                | glycolysis                                       | 64       | 6.71E-05 |
| 35               | not assigned                                     | 7981     | 1.82E-04 |
| 26               | misc                                             | 1242     | 2.81E-04 |
| 29               | protein                                          | 2997     | 3.80E-04 |
| 8                | TCA / org. transformation                        | 72       | 3.12E-03 |
| 9                | mitochondrial electron transport / ATP synthesis | 116      | 0.009    |
| 30               | signalling                                       | 1095     | 0.014    |
| 12               | N-metabolism                                     | 24       | 0.046    |
| 23               | nucleotide metabolism                            | 128      | 0.046    |
| 19               | tetrapyrrole synthesis                           | 43       | 0.052    |
| 14               | S-assimilation                                   | 13       | 0.058    |
| 34               | transport                                        | 880      | 0.078    |
| 21               | redox.regulation                                 | 183      | 0.099    |
| 25               | C1-metabolism                                    | 30       | 0.107    |
| 28               | DNA                                              | 917      | 0.140    |
| 1                | PS                                               | 162      | 0.150    |
| 11               | lipid metabolism                                 | 339      | 0.158    |
| 6                | gluconeogenesis/ glyoxylate cycle                | 10       | 0.201    |
| 15               | metal handling                                   | 58       | 0.214    |
| 32               | micro RNA, natural antisense etc                 | 44       | 0.232    |
| 18               | Co-factor and vitamine metabolism                | 42       | 0.258    |
| 16               | secondary metabolism                             | 345      | 0.442    |
| 10               | cell wall                                        | 439      | 0.445    |
| 3                | minor CHO metabolism                             | 122      | 0.450    |
| 22               | polyamine metabolism                             | 14       | 0.597    |
| 27               | RNA                                              | 2318     | 0.603    |
| 31               | cell                                             | 637      | 0.634    |
| 5                | fermentation                                     | 13       | 0.786    |
| 7                | OPP                                              | 31       | 0.813    |
| 17               | hormone metabolism                               | 456      | 0.920    |
| 2                | major CHO metabolism                             | 89       | 0.930    |
| 33               | development                                      | 556      | 0.939    |
| 13               | amino acid metabolism                            | 212      | 0.955    |
| 24               | Biodegradation of Xenobiotics                    | 23       | 0.987    |

*pnp1-1* -P vs WT -P

| bin <sup>a</sup> | name                                             | elements | p-value  |
|------------------|--------------------------------------------------|----------|----------|
| 9                | mitochondrial electron transport / ATP synthesis | 116      | 6.50E-10 |
| 34               | transport                                        | 880      | 1.80E-09 |
| 1                | PS                                               | 162      | 6.92E-08 |
| 29               | protein                                          | 2997     | 2.75E-07 |
| 10               | cell wall                                        | 439      | 1.24E-05 |
| 2                | major CHO metabolism                             | 89       | 6.15E-05 |
| 7                | OPP                                              | 31       | 6.17E-04 |
| 8                | TCA / org. transformation                        | 72       | 9.87E-04 |
| 28               | DNA                                              | 917      | 0.004    |
| 17               | hormone metabolism                               | 456      | 0.011    |
| 20               | stress                                           | 756      | 0.015    |
| 11               | lipid metabolism                                 | 339      | 0.020    |
| 23               | nucleotide metabolism                            | 128      | 0.028    |
| 4                | glycolysis                                       | 64       | 0.036    |
| 33               | development                                      | 556      | 0.047    |
| 26               | misc                                             | 1242     | 0.055    |
| 15               | metal handling                                   | 58       | 0.073    |
| 14               | S-assimilation                                   | 13       | 0.078    |
| 13               | amino acid metabolism                            | 212      | 0.092    |
| 24               | Biodegradation of Xenobiotics                    | 23       | 0.109    |
| 35               | not assigned                                     | 7981     | 0.140    |
| 5                | fermentation                                     | 13       | 0.147    |
| 6                | gluconeogenesis/ glyoxylate cycle                | 10       | 0.147    |
| 27               | RNA                                              | 2318     | 0.226    |
| 30               | signalling                                       | 1095     | 0.251    |
| 3                | minor CHO metabolism                             | 122      | 0.261    |
| 18               | Co-factor and vitamine metabolism                | 42       | 0.394    |
| 22               | polyamine metabolism                             | 14       | 0.504    |
| 25               | C1-metabolism                                    | 30       | 0.559    |
| 32               | micro RNA, natural antisense etc                 | 44       | 0.597    |
| 12               | N-metabolism                                     | 24       | 0.683    |
| 31               | cell                                             | 637      | 0.776    |
| 16               | secondary metabolism                             | 345      | 0.807    |
| 21               | redox.regulation                                 | 183      | 0.817    |
| 19               | tetrapyrrole synthesis                           | 43       | 0.863    |

**Table S5.** Statistical significance of the functional categorization of the microarray data using MapMan-defined bins.

The full dataset of each comparison (*pnp1-1* +P relative to WT on +P, etc.) was loaded to perform this analysis. As described in the MapMan manual, results are based on the Wilcoxon Rank Sum Test, with the goal of predicting BINs that exhibit a different behavior in terms of expression profile compared to all the other remaining BINs. The lists here represent only the major bins. <sup>a</sup> Indicates the number associated with each bin (or functional category) in the MapMan program. The number of elements of each category and the p-values are also indicated.

Table S6. Genes encoding chloroplast-targeted proteins which are similarly regulated in *pnp1-1* +P vs. WT +P, and in WT -P vs. WT +P.

| Probeset ID | AGI code  | <i>pnp1-1</i> +P<br>vs. WT+P |       | WT-P vs. WT+P  |       | Description                                         |
|-------------|-----------|------------------------------|-------|----------------|-------|-----------------------------------------------------|
|             |           | Fold<br>Change               | FDR   | Fold<br>Change | FDR   |                                                     |
| 250515_at   | At5g09570 | 39.15                        | 0.000 | 78.71          | 0.000 | Expressed protein                                   |
| 265674_at   | At2g32190 | 9.20                         | 0.003 | 8.18           | 0.006 | Expressed protein                                   |
| 262930_at   | At1g65690 | 7.06                         | 0.000 | 7.55           | 0.000 | Harpin-induced protein-related                      |
| 260399_at   | At1g72520 | 6.98                         | 0.002 | 3.03           | 0.035 | Lipoxygenase                                        |
| 258182_at   | At3g21500 | 5.82                         | 0.000 | 8.75           | 0.000 | 1-deoxy-d-xylulose 5-phosphate synthase             |
| 250090_at   | At5g17330 | 4.98                         | 0.018 | 4.34           | 0.045 | Glutamate decarboxylase 1 (GAD 1)                   |
| 265670_s_at | At2g32210 | 4.81                         | 0.005 | 3.27           | 0.029 | Expressed protein                                   |
| 257174_at   | At3g27190 | 3.72                         | 0.015 | 6.69           | 0.004 | Uracil phosphoribosyltransferase                    |
| 264400_at   | At1g61800 | 3.49                         | 0.016 | 10.56          | 0.002 | Glucose-6-phosphate/phosphate translocator          |
| 267592_at   | At2g39710 | 3.12                         | 0.005 | 2.80           | 0.014 | Aspartyl protease family protein                    |
| 252652_at   | At3g44720 | 2.90                         | 0.005 | 2.30           | 0.024 | Prephenate dehydratase family protein               |
| 256793_at   | At3g22160 | 2.71                         | 0.005 | 2.36           | 0.013 | VQ motif-containing protein                         |
| 267496_at   | At2g30550 | 2.68                         | 0.009 | 2.12           | 0.044 | Lipase class 3 family protein                       |
| 260602_at   | At1g55920 | 2.49                         | 0.009 | 3.23           | 0.003 | Serine O-acetyltransferase                          |
| 254331_s_at | At4g22710 | 2.27                         | 0.010 | 2.12           | 0.021 | Cytochrome P450 family protein                      |
| 246870_at   | At5g26030 | 2.24                         | 0.003 | 2.22           | 0.004 | Ferrochelatase I                                    |
| 253830_at   | At4g27652 | 2.10                         | 0.006 | 2.05           | 0.008 | Expressed protein                                   |
| 246517_at   | At5g15760 | 0.46                         | 0.006 | 0.47           | 0.009 | Plastid-specific 30S ribosomal protein 3            |
| 248402_at   | At5g52100 | 0.45                         | 0.014 | 0.44           | 0.023 | Dihydrodipicolinate reductase family protein        |
| 263136_at   | At1g78580 | 0.45                         | 0.027 | 0.43           | 0.035 | Trehalose-6-phosphate synthase                      |
| 246346_at   | At3g56810 | 0.43                         | 0.009 | 0.49           | 0.030 | Expressed protein                                   |
| 259707_at   | At1g77490 | 0.43                         | 0.004 | 0.42           | 0.004 | L-ascorbate peroxidase, thylakoid-bound (tapx)      |
| 259996_at   | At1g67910 | 0.41                         | 0.002 | 0.28           | 0.000 | Expressed protein                                   |
| 261196_at   | At1g12860 | 0.40                         | 0.023 | 0.43           | 0.048 | Basic helix-loop-helix (bHLH) family protein        |
| 249472_at   | At5g39210 | 0.39                         | 0.006 | 0.35           | 0.004 | Expressed protein                                   |
| 266616_at   | At2g29680 | 0.39                         | 0.028 | 0.18           | 0.004 | Cell division control protein CDC6                  |
| 254954_at   | At4g10910 | 0.32                         | 0.020 | 0.25           | 0.011 | Expressed protein                                   |
| 265312_at   | At2g20240 | 0.29                         | 0.001 | 0.29           | 0.001 | Expressed protein                                   |
| 260770_at   | At1g49200 | 0.21                         | 0.003 | 0.15           | 0.001 | Zinc finger (C3HC4-type RING finger) family protein |
| 263981_at   | At2g42870 | 0.10                         | 0.003 | 0.17           | 0.010 | Expressed protein                                   |

**Table S7.** Normalized expression data of the quantitative RT-PCR experiment.

| Annotation<br>AGI | <i>PHR1</i><br>At4g28610 |      |               | <i>RNS1</i><br>At2g02990 |      |               | <i>PHT1;1</i><br>At5g43350 |      |               | <i>PHT1;4</i><br>At2g38940 |      |               |
|-------------------|--------------------------|------|---------------|--------------------------|------|---------------|----------------------------|------|---------------|----------------------------|------|---------------|
|                   | qPCR<br>fold             | SEM  | array<br>fold | qPCR<br>fold             | SEM  | array<br>fold | qPCR<br>fold               | SEM  | array<br>fold | qPCR<br>fold               | SEM  | array<br>fold |
| WT +P             | 0.88                     | 0.07 | 1.17          | 0.11                     | 0.02 | 0.10          | 0.04                       | 0.01 | 0.02          | 0.02                       | 0.00 | 0.002         |
| WT -P             | 0.95                     | 0.07 | 1.00          | 0.84                     | 0.08 | 0.63          | 0.64                       | 0.06 | 0.68          | 0.79                       | 0.09 | 0.76          |
| <i>pnp1-1</i> +P  | 0.84                     | 0.06 | 1.10          | 0.33                     | 0.08 | 0.38          | 0.13                       | 0.02 | 0.13          | 0.04                       | 0.00 | 0.02          |
| <i>pnp1-1</i> -P  | 1.00                     | 0.06 | 1.00          | 1.00                     | 0.06 | 1.00          | 1.00                       | 0.11 | 1.00          | 1.00                       | 0.07 | 1.00          |

| Annotation<br>AGI | <i>JACALIN</i><br>At1g52100 |      |               | <i>RNaseH</i><br>At1g24090 |      |               | <i>PORA</i><br>At5g54190 |      |               | <i>PSBP2</i><br>At2g30790 |      |               |
|-------------------|-----------------------------|------|---------------|----------------------------|------|---------------|--------------------------|------|---------------|---------------------------|------|---------------|
|                   | qPCR<br>fold                | SEM  | array<br>fold | qPCR<br>fold               | SEM  | array<br>fold | qPCR<br>fold             | SEM  | array<br>fold | qPCR<br>fold              | SEM  | array<br>fold |
| WT +P             | 0.03                        | 0.01 | 0.04          | 0.24                       | 0.02 | 0.16          | 0.62                     | 0.08 | 1.40          | 0.57                      | 0.06 | 0.97          |
| WT -P             | 0.04                        | 0.01 | 0.05          | 0.40                       | 0.05 | 0.18          | 1.00                     | 0.11 | 1.00          | 1.00                      | 0.09 | 1.00          |
| <i>pnp1-1</i> +P  | 1.00                        | 0.09 | 1.00          | 0.88                       | 0.07 | 1.12          | 0.08                     | 0.01 | 0.13          | 0.15                      | 0.01 | 0.13          |
| <i>pnp1-1</i> -P  | 0.64                        | 0.08 | 0.86          | 1.00                       | 0.06 | 1.00          | 0.09                     | 0.01 | 0.13          | 0.18                      | 0.02 | 0.21          |

| Annotation<br>AGI | <i>At4</i><br>At5g03545 |       | <i>IPS1</i><br>At3g0922 |      | Annotation<br>AGI | <i>PNP</i><br>At3g03710 |      |               | <i>IPS1</i><br>At3g0922 |       |
|-------------------|-------------------------|-------|-------------------------|------|-------------------|-------------------------|------|---------------|-------------------------|-------|
|                   | qPCR<br>fold            | SEM   | qPCR<br>fold            | SEM  |                   | qPCR<br>fold            | SEM  | array<br>fold | qPCR<br>fold            | SEM   |
| WT +P             | 0.010                   | 0.001 | 0.004                   | 0.00 | WT +P             | 1.00                    | 0.15 | 1             | 0.000                   | 0.000 |
| WT -P             | 1.00                    | 0.06  | 1.00                    | 0.12 | WT -P             | 0.48                    | 0.11 | 0.50          | 1.00                    | 0.28  |
| <i>pnp1-1</i> +P  | 0.009                   | 0.001 | 0.007                   | 0.00 | <i>phr1-1</i> +P  | 0.99                    | 0.16 |               | 0.000                   | 0.000 |
| <i>pnp1-1</i> -P  | 0.45                    | 0.03  | 0.74                    | 0.14 | <i>phr1-1</i> -P  | 0.48                    | 0.06 |               | 0.000                   | 0.000 |

The fold change expression of at least 3 biological replicates (tested by at least 2 technical replicates for each) was normalized to *ACT2*. The data were adjusted to the sample with the highest expression level of each gene. SEM stands for standard error of the mean. The relative expression from the microarray experiment was calculated relative to the sample with the highest expression in the qRT-PCR assay and indicated for the relevant genes.

**Table S8.** Primers used for quantitative RT-PCR

| AGI       | Annotation    | Forward primer (5'-3')      | Reverse primer (5'-3')    |
|-----------|---------------|-----------------------------|---------------------------|
| At3g18780 | <i>ACT2</i>   | ATTCTTGCTTCCCTCAGCAC        | CCCCAGCTTTTTAAGCCTTT      |
| At4g28610 | <i>PHR1</i>   | AGTCTTGGCGGTAGTGAAAGAG      | AGCGGTGTCAACTTCCTTTCTGG   |
| At2g02990 | <i>RNS1</i>   | TGATGCCTCTAAACCATTTCGAT     | TACCATGCTTCTCCCATTCCG     |
| At5g43350 | <i>PHT1;1</i> | AATTTCTCCTGCCAAGCTGA        | AGGCATCGGTAAAGAAACCC      |
| At2g38940 | <i>PHT1;4</i> | TCAATGGCGTTGCCTTCTGT        | ATCACCAAGCCACCCGAAA       |
| At1g52100 | Jacalin       | TATATGTAGGACAAGGCGATGTTGG   | AGCAATGTTTCCTTTCCATGTCTTT |
| At1g24090 | RNase H       | CGCCACATAGTCATACACCG        | GGTCTCGGCTTTTACCATCA      |
| At5g54190 | <i>PORA</i>   | AAGATTGTTGATTGATGACTTGAAGAA | AATGTATTAGTGTTCGTTATGGAT  |
| At2g30790 | <i>PSBP2</i>  | ATCGTCGTTTCGTCATGTGTCC      | CAGCACCAACGAGTAAGGTAAGG   |
| At5g03545 | <i>At4</i>    | CTGAAGCTCAAGAACCCTCTGAA     | CCTCTCAAACCCTTTATTGGTGA   |
| At3g09922 | <i>IPS1</i>   | AGACTGCAGAAGGCTGATTCAGA     | TTGCCCAATTTCTAGAGGGAGA    |
| At3g03710 | <i>PNP</i>    | GGAGCGATTCTCAGCTGTAGTTC     | GGCGTAGAGGTCTATCGATCAACC  |



## **Legends to Supplemental Data presented as separate files**

Supplemental Table S1. Dataset of relative changes in metabolite levels of *pnp1-1* and WT under +P conditions and during P starvation (after three hours, six hours, one week and three weeks). Data are normalized with respect to the internal standard and the FW.

Supplemental Table S2. Metabolite two way ANOVA and PCA statistical details.

Supplemental Table S3. ATH1 microarray data for three hour P starvation experiment. The significantly regulated genes in the different comparisons are listed. The fold change was calculated as the ratio of mean of the signal intensities ( $\geq 2$ -fold change, FDR < 0.05).

Supplemental Table S4. ATH1 microarray data for the one week P starvation experiment. The significantly regulated genes in the different comparisons are listed. The fold change was calculated as the ratio of mean of the signal intensities ( $\geq 2$ -fold change, FDR < 0.05).
